# Supplementary material for: Physico-chemical investigation and antimicrobial efficacy of ozonated oils. The case study of commercial ozonated olive and sunflower seed refined oils
Source: Preprints.org preprint supplement (doi:10.20944/preprints202312.0991.v1), 2023-12-13
Supplement: Supplementary file 1 [file supplementary]

## SCHEDA TECNICA

|                                                                              |  |                                                                               |
|------------------------------------------------------------------------------|--|-------------------------------------------------------------------------------|
| <b>Committente / Customer:</b>                                               |  | Data ricevimento /<br>Date of the sample: 03/07/2018                          |
| <b>OS s.r.l.</b><br>Viale Fratelli Rosselli, 46 – 61121 PESARO (PU) - Italia |  | Data inizio analisi /<br>Start date analysis: 05/07/2018                      |
|                                                                              |  | Data fine analisi /<br>End date analysis: 16/07/2018<br>Revisione: 27/09/2021 |
| <b>CODICE analisi / Analysis CODE N°: 1807031</b>                            |  |                                                                               |
| <b>Prodotto / Sample description</b>                                         |  |                                                                               |
| <b>PURE OIL 100% ozonized olive oil</b>                                      |  | <b>LOTTO N° 17418</b>                                                         |

|                 |                                                                                          |
|-----------------|------------------------------------------------------------------------------------------|
| Nome prodotto   | Pure oil 100% olio di oliva ozonizzato<br>Ozonized Olea europea (olive) fruit with Ozone |
| INCI NAME/IUPAC | OZONIZED OLEA EUROPEA (OLIVE) FRUIT OIL                                                  |
| Composizione    | Olio di oliva ozonizzato (Olea europea oil, ozone)                                       |
| EINECS          | 919-979-9                                                                                |
| Descrizione     | Prodotto per uso esterno a base di olio di oliva sottoposto ad ozonizzazione.            |
| Categoria       | Oli naturali                                                                             |
| Aspetto a 20°C  | Liquido oleoso traslucido, leggermente opalescente                                       |
| Colore          | Giallo chiaro paglierino                                                                 |
| Odore           | Profumazione caratteristica                                                              |

| PROVA ANALITICA CHIMICO FISICA                                  | RISULTATO                                                                                                                                     | Intervallo di accettabilità                     |
|-----------------------------------------------------------------|-----------------------------------------------------------------------------------------------------------------------------------------------|-------------------------------------------------|
| pH = -log[H <sup>+</sup> ] a 20°C                               | n.a.                                                                                                                                          | non applicabile                                 |
| Densità (g/cm <sup>3</sup> ) a 20°C                             | 0,900                                                                                                                                         | Conforme (limiti: 0.800 ÷ 1.000)                |
| Viscosità (mPas)<br>Gir.5 rpm 20 a 25°C                         | 86,0                                                                                                                                          | Conforme (limiti: 80 ÷ 200)                     |
| Torbidità colore (NTU/FTU)                                      | <1                                                                                                                                            | Conforme (limiti: 0 ÷ 20)                       |
| Acidità (g ac. oleico/100 g)                                    | 9,93                                                                                                                                          | Conforme (limite: <30)                          |
| Numero di ossidazione (meqO <sub>2</sub> /kg)<br>(metodo ISCO3) | 3110                                                                                                                                          | Conforme (limiti: 2900 ÷ 3300)                  |
| Nichel test (mg/Kg)<br>APAT CNR IRSA 3220 Man29 2003            | 0.05                                                                                                                                          | Conforme (limite quantitativo di prova di 0.05) |
| Solubilità                                                      | Non solubile in acqua, solubile in glicerina /paraffina<br>Liposolubile in oli e disperdibile in emulsioni.                                   |                                                 |
| Conservazione                                                   | Conservare in luogo fresco, asciutto e al buio;<br>lontano da fonti di calore; accuratamente chiuso<br>senza contatto con l'ambiente esterno. |                                                 |
| Settori di utilizzo                                             | Cosmetico, farmaceutico uso topico, veterinario.                                                                                              |                                                 |
| Concentrazione di utilizzo                                      | Da 0,1% al 100% (in funzione della formulazione)                                                                                              |                                                 |

| PROVA ANALITICA MICROBIOLOGICA                   | U.M     | Intervallo di accettabilità        |
|--------------------------------------------------|---------|------------------------------------|
| Carica microbica totale (ISO 21149:2009)         | <10     | Conforme (Limite: $\leq 10$ CFU/g) |
| <i>Staphylococcus aureus</i> (Baird Parker Agar) | Assente | Conforme (Limite: Assente in 1 g)  |
| <i>Escherichia coli</i> (VRBL Agar)              | Assente | Conforme (Limite: Assente in 1 g)  |
| <i>Pseudomonas aeruginosa</i> (Cetrimide Agar)   | Assente | Conforme (Limite: Assente in 1 g)  |
| <i>Candida albicans</i> (SDA+CF Agar)            | Assente | Conforme (Limite: Assente in 1 g)  |
| <i>Aspergillus species</i> (SDA+CF Agar)         | Assente | Conforme (Limite: Assente in 1 g)  |

CFU/g = unità formanti colonia relative a 1 grammo di campione /  
*Colony Forming Units per 1 g of the sample.*

U.M = Unità di Misura

**\*Riferimenti normativi/ Normative references**

In base ai criteri di accettabilità in base alla 10<sup>a</sup> edizione della Farmacopea Europea (PhEur), aggiornamento 07/2020, alla Linea guida *Scientific Committee on Consumer Safety* (SCCS\_s\_004 *Guidance for testing cosmetics*) il limite quantitativo della carica aerobica mesofila totale è stato indicato come corrispondente a  $\leq 10$  cfu/g e patogeni assenti.

|                                 |                                                                                                                                                                               |
|---------------------------------|-------------------------------------------------------------------------------------------------------------------------------------------------------------------------------|
| Caratteristiche microbiologiche | Non è possibile la presenza o l'eventuale crescita di microrganismi, in quanto la presenza di ozonidi (derivati dall'ozonizzazione) determina caratteristiche antimicrobiche. |
|---------------------------------|-------------------------------------------------------------------------------------------------------------------------------------------------------------------------------|

Data / Date: 16/07/2018

Revisione: 27/09/2021

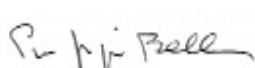

  
(Responsabile scientifico  
Firma / Signature Prof Pier Giorgio Balboni)  
in collaborazione con Prof. P. G. Balboni  
docente incaricato di insegnamento (MED/07)  
Università degli studi di Ferrara
