# Supplementary material for: Physico-chemical investigation and antimicrobial efficacy of ozonated oils. The case study of commercial ozonated olive and sunflower seed refined oils
Source: Preprints.org preprint supplement (doi:10.20944/preprints202312.0991.v1), 2023-12-13
Supplement: Supplementary file 2 [file supplementary]

## SCHEDA TECNICA

|                                                                              |  |                                                                               |
|------------------------------------------------------------------------------|--|-------------------------------------------------------------------------------|
| <b>Committente / Customer:</b>                                               |  | Data ricevimento /<br>Date of the sample: 16/09/2021                          |
| <b>OS s.r.l.</b><br>Viale Fratelli Rosselli, 46 – 61121 PESARO (PU) - Italia |  | Data inizio analisi /<br>Start date analysis: 16/09/2021                      |
|                                                                              |  | Data fine analisi /<br>End date analysis: 24/09/2021<br>Revisione: 27/09/2021 |
| <b>CODICE analisi / Analysis CODE N°: 210921</b>                             |  |                                                                               |
| <b>Prodotto / Sample description</b>                                         |  |                                                                               |
| <b>PURE SUN 100% ozonized sunflower oil</b>                                  |  | <b>LOTTO N° 210726</b>                                                        |

|                       |                                                                                                                                                                                                                                                                                                                                                                                                                                                 |
|-----------------------|-------------------------------------------------------------------------------------------------------------------------------------------------------------------------------------------------------------------------------------------------------------------------------------------------------------------------------------------------------------------------------------------------------------------------------------------------|
| Nome prodotto         | Ozonized Sunflower Seed Oil (Heliantus annuus (sunflower) seed oil with Ozone                                                                                                                                                                                                                                                                                                                                                                   |
| INCI NAME/IUPAC       | Ozonized Sunflower Seed Oil (Heliantus annuus (sunflower) seed oil with Ozone                                                                                                                                                                                                                                                                                                                                                                   |
| Composizione          | Olio di semi di girasole ozonizzato                                                                                                                                                                                                                                                                                                                                                                                                             |
| CAS no. (ECHA Europa) | -                                                                                                                                                                                                                                                                                                                                                                                                                                               |
| EC no. (ECHA Europa)  | 924-751-7                                                                                                                                                                                                                                                                                                                                                                                                                                       |
| Descrizione           | Olio di semi di girasole ad elevato carico di Ozono (numero perossidi $\geq 3000 \text{ meqO}_2/\text{kg}$ - metodo d'analisi $\text{IscO}_3$ )<br>Olio di semi di girasole con presenza di gruppi idroperossidici nell'acido grasso dei trigliceridi, per reazione di addizione negli acidi grassi insaturi a doppio legame dopo il trattamento con ozono.<br>Prodotto per uso esterno a base di olio di girasole sottoposto ad ozonizzazione. |
| Categoria             | Oli naturali                                                                                                                                                                                                                                                                                                                                                                                                                                    |
| Aspetto a 20°C        | Liquido oleoso traslucido, leggermente opalescente                                                                                                                                                                                                                                                                                                                                                                                              |
| Colore                | Giallo paglierino                                                                                                                                                                                                                                                                                                                                                                                                                               |
| Odore                 | Profumazione caratteristica                                                                                                                                                                                                                                                                                                                                                                                                                     |
| Solubilità            | Non solubile in acqua, solubile in glicerina /paraffina liposolubile in oli e disperdibile in emulsioni.                                                                                                                                                                                                                                                                                                                                        |

| PARAMETRI CHIMICO FISICI                                                     | RISULTATO                                                                                                                                     | Intervallo di accettabilità      |
|------------------------------------------------------------------------------|-----------------------------------------------------------------------------------------------------------------------------------------------|----------------------------------|
| Torbidità colore (NTU/FTU)                                                   | <1                                                                                                                                            | Conforme (limiti: 0 ÷ 20)        |
| Acidità mg KOH/g                                                             | 28                                                                                                                                            | Conforme (limiti: <30 mg KOH/g)  |
| Densità (g/cm <sup>3</sup> ) a 20°C                                          | 0,990                                                                                                                                         | Conforme (limiti: 0.920 ÷ 1.000) |
| Viscosità (mPas)<br>Gir.5 rpm 20 a 25°C                                      | 180,0                                                                                                                                         | Conforme (limiti: 80 ÷ 250)      |
| Numero di ossidazione (meqO <sub>2</sub> /kg)<br>(metodo ISCO <sub>3</sub> ) | 3520                                                                                                                                          | Conforme (limiti: 3000 ÷ 3600)   |
| Conservazione                                                                | Conservare in luogo fresco, asciutto e al buio;<br>lontano da fonti di calore; accuratamente chiuso<br>senza contatto con l'ambiente esterno. |                                  |

| PARAMETRI MICROBIOLOGICI                         | U.M     | Intervallo di accettabilità        |
|--------------------------------------------------|---------|------------------------------------|
| Carica microbica totale (ISO 21149:2009)         | <10     | Conforme (Limite: $\leq 10$ CFU/g) |
| <i>Staphylococcus aureus</i> (Baird Parker Agar) | Assente | Conforme (Limite: Assente in 10 g) |
| <i>Escherichia coli</i> (VRBL Agar)              | Assente | Conforme (Limite: Assente in 1 g)  |
| <i>Pseudomonas aeruginosa</i> (Cetrimide Agar)   | Assente | Conforme (Limite: Assente in 1 g)  |
| <i>Candida albicans</i> (SDA+CF Agar)            | Assente | Conforme (Limite: Assente in 1 g)  |
| <i>Aspergillus species</i> (SDA+CF Agar)         | Assente | Conforme (Limite: Assente in 1 g)  |

U.M. = Unità di misura

CFU/g = unità formanti colonia relative a 1 grammo di campione /  
*Colony Forming Units per 1 g of the sample.*

|                                 |                                                                                                                                                                               |
|---------------------------------|-------------------------------------------------------------------------------------------------------------------------------------------------------------------------------|
| Caratteristiche microbiologiche | Non è possibile la presenza o l'eventuale crescita di microrganismi, in quanto la presenza di ozonidi (derivati dall'ozonizzazione) determina caratteristiche antimicrobiche. |
| Settori di utilizzo             | Cosmetico, farmaceutico come medical device ad uso topico, veterinario.                                                                                                       |
| Concentrazione di utilizzo      | Da 0,1% al 100% (in funzione della formulazione)                                                                                                                              |

Data / Date: 24/09/2021



  
(Responsabile scientifico  
Firma / Signature Prof Pier Giorgio Balboni)  
in collaborazione con Prof. P. G. Balboni  
docente incaricato di insegnamento (MED/07)  
Università degli studi di Ferrara
